# Supplementary material for: Ti3C2Tx MXene-embedded MnO2-based hydrophilic electrospun carbon nanofibers as a freestanding electrode for supercapacitors
Source: Royal Society of Chemistry journal article supplement (doi:10.1039/d3cc03925k), 2023-01-01
Supplement: d3cc03925k1.pdf [file d3cc03925k1.pdf]

## Supporting Information

### **Ti<sub>3</sub>C<sub>2</sub>T<sub>x</sub> MXene - embedded MnO<sub>2</sub>-based hydrophilic electrospun carbon nanofibers as a freestanding electrode for supercapacitors**

Zhaorui Wang <sup>1</sup>, Deyang Zhang <sup>1\*</sup>, Ying Guo <sup>1</sup>, Hao Jiang <sup>2</sup>, Di Wang <sup>1</sup>, Jinbing Cheng <sup>2\*</sup>, Paul K. Chu <sup>3</sup>, Hailong Yan <sup>1</sup>, Yongsong Luo <sup>1,2\*</sup>

<sup>1</sup> Henan Joint International Research Laboratory of New Energy Storage Technology, Xinyang Normal University, Xinyang 464000, P. R. China

<sup>2</sup> College of Physics and Electronic Engineering, Nanyang Normal University, Nanyang 473061, P. R. China

<sup>3</sup> Department of Physics, Department of Materials Science & Engineering, and Department of Biomedical Engineering, City University of Hong Kong, Tat Chee Avenue, Kowloon, Hong Kong, China

## Experimental Section

### Materials

The  $\text{Ti}_3\text{AlC}_2$  powder (400 mesh) was purchased from Enwang New Materials Technology Co., Ltd. and manganese acetate tetrahydrate ( $\text{Mn}(\text{CH}_3\text{COO})_2 \cdot 4\text{H}_2\text{O}$ , 99%), anhydrous sodium sulfate ( $\text{Na}_2\text{SO}_4$ ,  $\geq 99.0\%$ ), N, N-dimethyl formamide (DMF, 99.9%), and polyacrylonitrile (PAN,  $M_w = 150,000$ ) were provided by Aladdin. All the reagents were analytical grade and used without further purification.

### Synthesis of $\text{Ti}_3\text{C}_2\text{T}_x$ MXene

The  $\text{Ti}_3\text{C}_2\text{T}_x$  nanosheets were produced by LiF/HCl etching and exfoliation  $\text{Ti}_3\text{AlC}_2$ . Typically, LiF (1 g) was added to 30 ml of 9 mol/L hydrochloric acid and heated to  $36^\circ\text{C}$  during stirring. 5 ml of 40% HF were added when the solution became clear and after 1 g of  $\text{Ti}_3\text{AlC}_2$  MAX was added, the reaction proceeded for 12 h. The black solution was washed repeatedly with deionized water and centrifuged at 5,000 rpm until the  $\text{pH} \geq 6$ . The dark green mud deposit was collected and transferred to a bottle under Ar atmosphere and sonicated under Ar for an hour. It was washed repeatedly with deionized water and centrifuged at 10,000 rpm to collect the product. To obtain the solution for electrospinning, the product obtained from the previous step was washed three times with DMF, and the concentration was adjusted to  $20 \text{ mg mL}^{-1}$ .

### Synthesis of $\text{Ti}_3\text{C}_2\text{T}_x/\text{CNFs}$

The  $\text{Ti}_3\text{C}_2\text{T}_x/\text{CNFs}$  were synthesized by electrospinning, pre-oxidation, and carbonization. In brief, polyacrylonitrile (0.65 g) was dispersed in 5 ml of the  $\text{Ti}_3\text{C}_2\text{T}_x$  solution, stirred continuously for 6 h, and placed in a 5 mL plastic syringe with an 18 G blunt-tip needle. A positive voltage (20 kV) was applied to the needle tip and the copper collector roller covered by an aluminum foil was grounded. The distance between the needle tip and collector was 12 cm, and the infusion rate of the solution was  $0.8 \text{ mL h}^{-1}$ . The samples were electrospun at a relative humidity below 30%. The electrospun mats were first stabilized in air at  $267 \text{ }^\circ\text{C}$  for 2 h at a ramping rate of  $3 \text{ }^\circ\text{C min}^{-1}$  and then carbonized under argon at a ramping rate of  $2 \text{ }^\circ\text{C min}^{-1}$  at  $800 \text{ }^\circ\text{C}$  for up to 2 h.

#### **Synthesis of $\text{MnO}_2@ \text{Ti}_3\text{C}_2\text{T}_x / \text{CNFs}$**

$\text{MnO}_2$  nanosheets were prepared by anodic constant current electrodeposition on CH660E electrochemical workstation. Typical, the electrodeposition solution was prepared by adding 6mM manganese acetate and sodium sulfate to 60ml deionized water. Before electrodeposition, a film was weighed as  $m_1$ . A three-electrode system was assembled, in which the working electrode was  $\text{Ti}_3\text{C}_2\text{T}_x/\text{CNFs}$ , the pair motor was platinum plate electrode, and the reference electrode was SCE. The anode current was set to  $0.0013 \text{ mA / cm}^2$  relative to the film area. The electrodeposition time is set to 350 s. After the electrodeposition, the electrode was washed with deionized water and dried in an oven at  $60 \text{ }^\circ\text{C}$  for 1 hour and weighed as  $m_2$ .  $m_1 - m_2$  is the active mass for the  $\text{MnO}_2@ \text{Ti}_3\text{C}_2\text{T}_x/\text{CNFs}$  material.  $\text{MnO}_2@ \text{Ti}_3\text{C}_2\text{T}_x$  and  $\text{MnO}_2@ \text{CNFs}$  were

fabricated by the same method. Where  $\text{Ti}_3\text{C}_2\text{T}_x$  is obtained by vacuum filtration.

### **Fabrication of all-solid-state asymmetric supercapacitors**

The all-solid-state button asymmetric supercapacitors (ASCs) were assembled with  $\text{MnO}_2@\text{Ti}_3\text{C}_2\text{T}_x/\text{CNFs}$  and  $\text{AC}@\text{NC}$  as the positive and negative electrodes, respectively and 1 M  $\text{Na}_2\text{SO}_4$  as the electrolyte. The specific capacity of activated carbon is 150 F/g. The activated carbon slurry is composed of activated carbon, conductive carbon black and PTFE, and the ratio is 7: 2: 1. In order to ensure the charge balance, the load quality of the cathode should be matched with the anode.

### **Materials characterization**

The crystalline structure and phase of the composites were identified by X-ray diffraction (XRD, Bruker D2 PHASER) using  $\text{Cu-K}_\alpha$  ( $\lambda = 1.5418 \text{ \AA}$ ) radiation at 40 kV, 40 mA, and  $2\theta$  between  $5^\circ$  and  $80^\circ$  at room temperature. Raman scattering was carried out on the INVIA Raman microprobe (Renishaw Instruments) with a 532 nm laser source and a  $50\times$  objective lens at a laser power of 5%. The chemical composition was determined by X-ray photoelectron spectroscopy (XPS, K-ALPHA 0.5 eV) with a resolution of 0.3-0.5 eV using a monochromatic aluminum X-ray source. The morphology was examined by field-emission scanning electron microscopy (SEM, Hitachi S-4800) and transmission electron microscopy (TEM, FEI Tecnai G2 F20) and elemental analysis was carried out by energy-dispersive X-ray spectroscopy (EDS, Bruker QUANTAX) on the TEM.

## Electrochemical assessment

The electrochemical properties of  $\text{MnO}_2@\text{CNFs}$ ,  $\text{MnO}_2@\text{Ti}_3\text{C}_2\text{T}_x$ , and  $\text{MnO}_2@\text{Ti}_3\text{C}_2\text{T}_x/\text{CNFs}$  were determined in 1 M  $\text{Na}_2\text{SO}_4$  using the traditional three-electrode system at 25 °C. The platinum and saturated calomel electrodes were the counter and reference electrodes, respectively, in the CHI660E electrochemical workstation. The asymmetric supercapacitor was assembled with  $\text{MnO}_2@\text{Ti}_3\text{C}_2\text{T}_x/\text{CNFs}$  as the positive electrode, AC as the negative electrode, and PVA/ $\text{Na}_2\text{SO}_4$  gel electrolyte as the electrolyte.

Cyclic voltammetry (CV) was performed in a voltage window from 0 to 1 V, and the GCD curves were acquired between 0 and 1 V. Electrochemical impedance spectroscopy (EIS) was conducted at frequencies between 0.01 Hz and 100 kHz. The specific capacitance ( $C_m$ ,  $\text{F g}^{-1}$ ) was calculated by the following equation:

$$C_m = \frac{I \times \Delta t}{m \times \Delta V},$$

where  $I$  (A) is the applied current,  $\Delta t$  (s) is the discharging time,  $\Delta V$  (V) is the discharging potential range, and  $m$  (g) is the total mass of active materials. The theoretical pseudo capacitance was calculated as follows:

$$C = \frac{n \times F}{M \times V},$$

where  $n$  (mol) is the number of electrons transferred in the redox reaction,  $M$  ( $\text{g. mol}^{-1}$ ) is the molar mass of the materials,  $F$  ( $\text{C. mol}^{-1}$ ) is Faraday's constant, and  $V$  (V) is the operating voltage window, respectively. The charge balance between the two

electrodes should follow the relationship  $q^+ = q^-$ , where  $q$  is the charge stored in the electrode calculated by the following equation:

$$q = C_m \times \Delta E \times m,$$

where  $C_m$  ( $F\ g^{-1}$ ) is the specific capacitance,  $\Delta E$  (V) is the potential range in the charging/discharging process, and  $m$  (g) is the mass loading of the active materials.

The ideal mass ratio of the active materials on the positive ( $MnO_2@Ti_3C_2Tx/CNFs$ ) and the negative electrode (AC) in the asymmetric supercapacitor ( $m^+/m^-$ ) was calculated by the equation:

$$\frac{m^+}{m^-} = \frac{\Delta E_- \times C_-}{\Delta E_+ \times C_+}.$$

The energy density ( $E$ ) and power density ( $P$ ) were calculated by the following equations:

$$E = \frac{1}{2 \times 3.6} C_m (\Delta E)^2 \quad \text{and}$$

$$P = \frac{E \times 3600}{\Delta t},$$

where  $E$  ( $Wh\ kg^{-1}$ ) is the energy density,  $C_m$  ( $F\ g^{-1}$ ) is the specific capacitance,  $\Delta V$  (V) is the operating potential window,  $P$  ( $kW\ kg^{-1}$ ) is the power density, and  $\Delta t$ (s) is the discharging time.

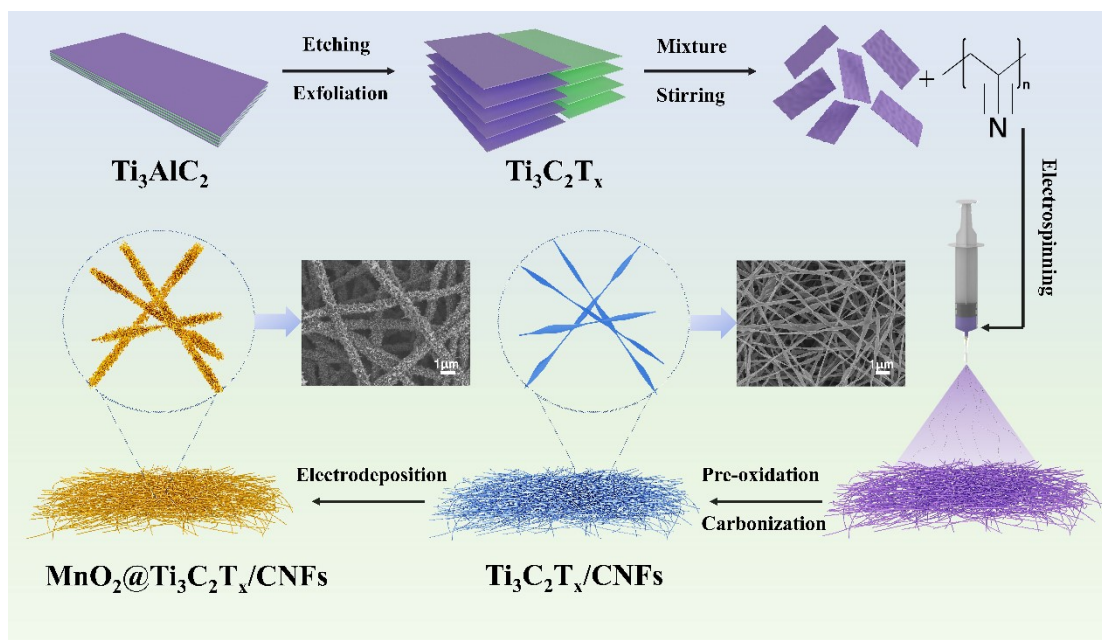

Figure S1. Schematic illustration of the multi-step fabrication procedures of the  $\text{MnO}_2@\text{Ti}_3\text{C}_2\text{T}_x/\text{CNFs}$  nanocomposite.

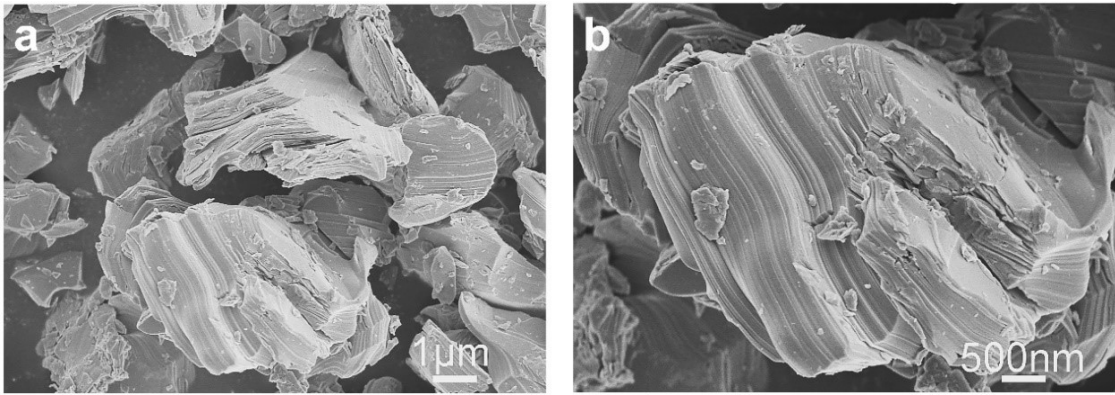

Figure S2. (a-b) SEM images of the Ti<sub>3</sub>AlC<sub>2</sub> powders.



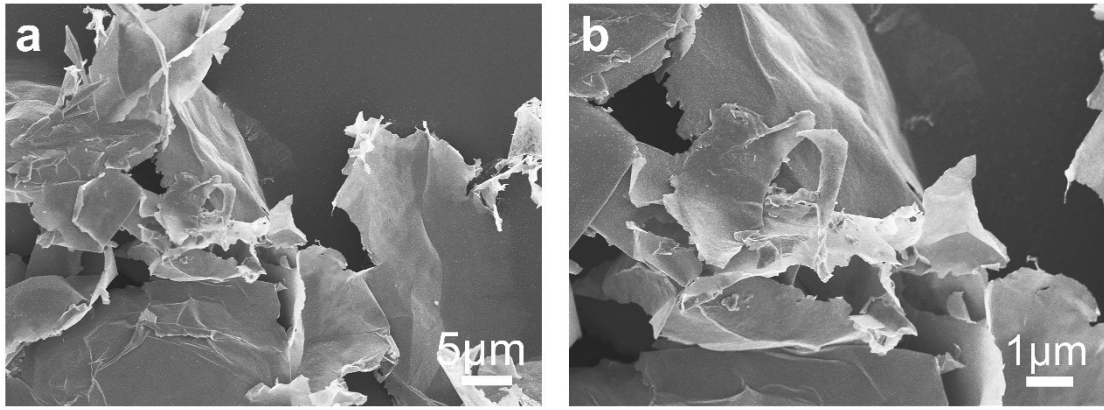

Figure S3. (a-b) SEM images of the  $Ti_3C_2T_x$  powders.

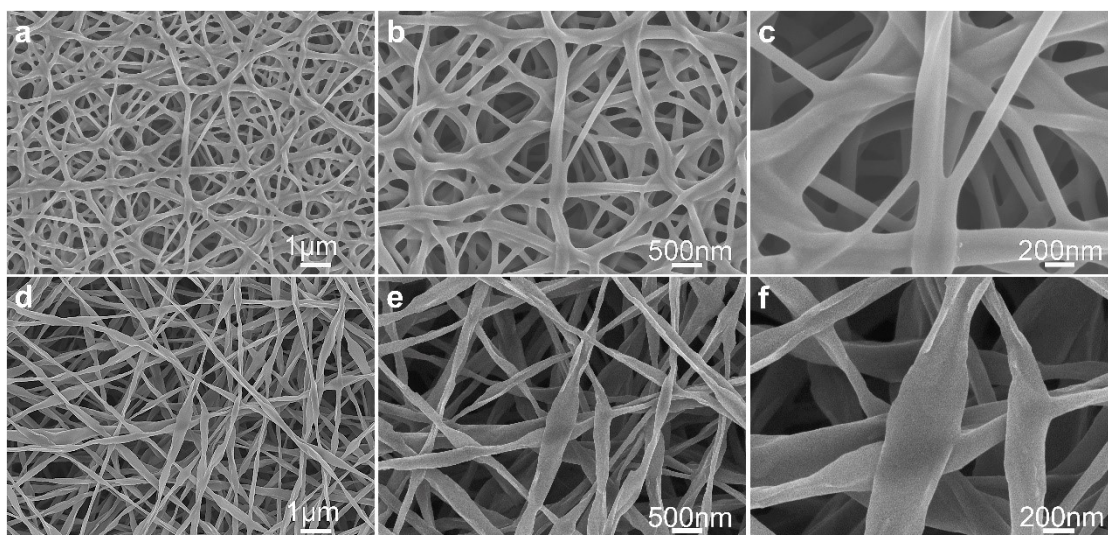

Figure S4. SEM images: (a-b) CNFs and (d-f) Ti<sub>3</sub>C<sub>2</sub>T<sub>x</sub>/CNFs.

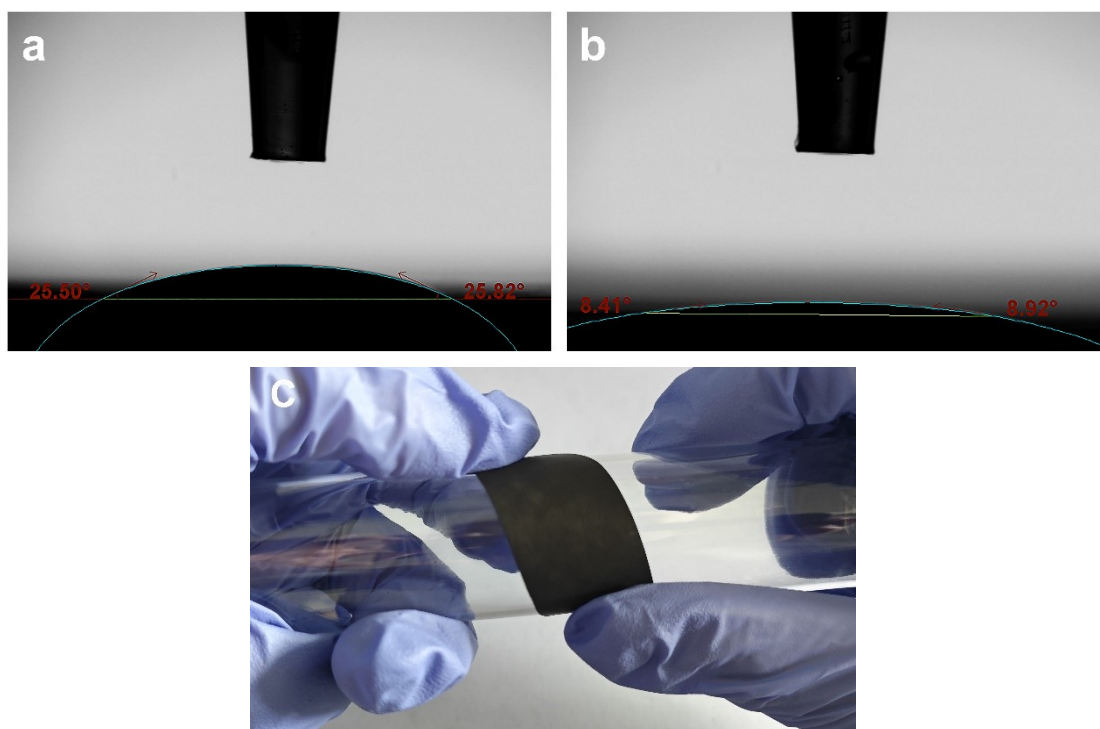

Figure S5. (a-b) Hydrophilicity comparison of CNFs and  $\text{Ti}_3\text{C}_2\text{T}_x/\text{CNFs}$  (Left contact angle of CNFs is  $25.5^\circ$ , right is  $25.85^\circ$ , and mean is  $25.66^\circ$ ; Left contact angle of  $\text{Ti}_3\text{C}_2\text{T}_x/\text{CNFs}$  is  $8.41^\circ$ , right is  $8.92^\circ$ , and mean is  $8.67^\circ$ ; (c) Flexibility of the thin film.

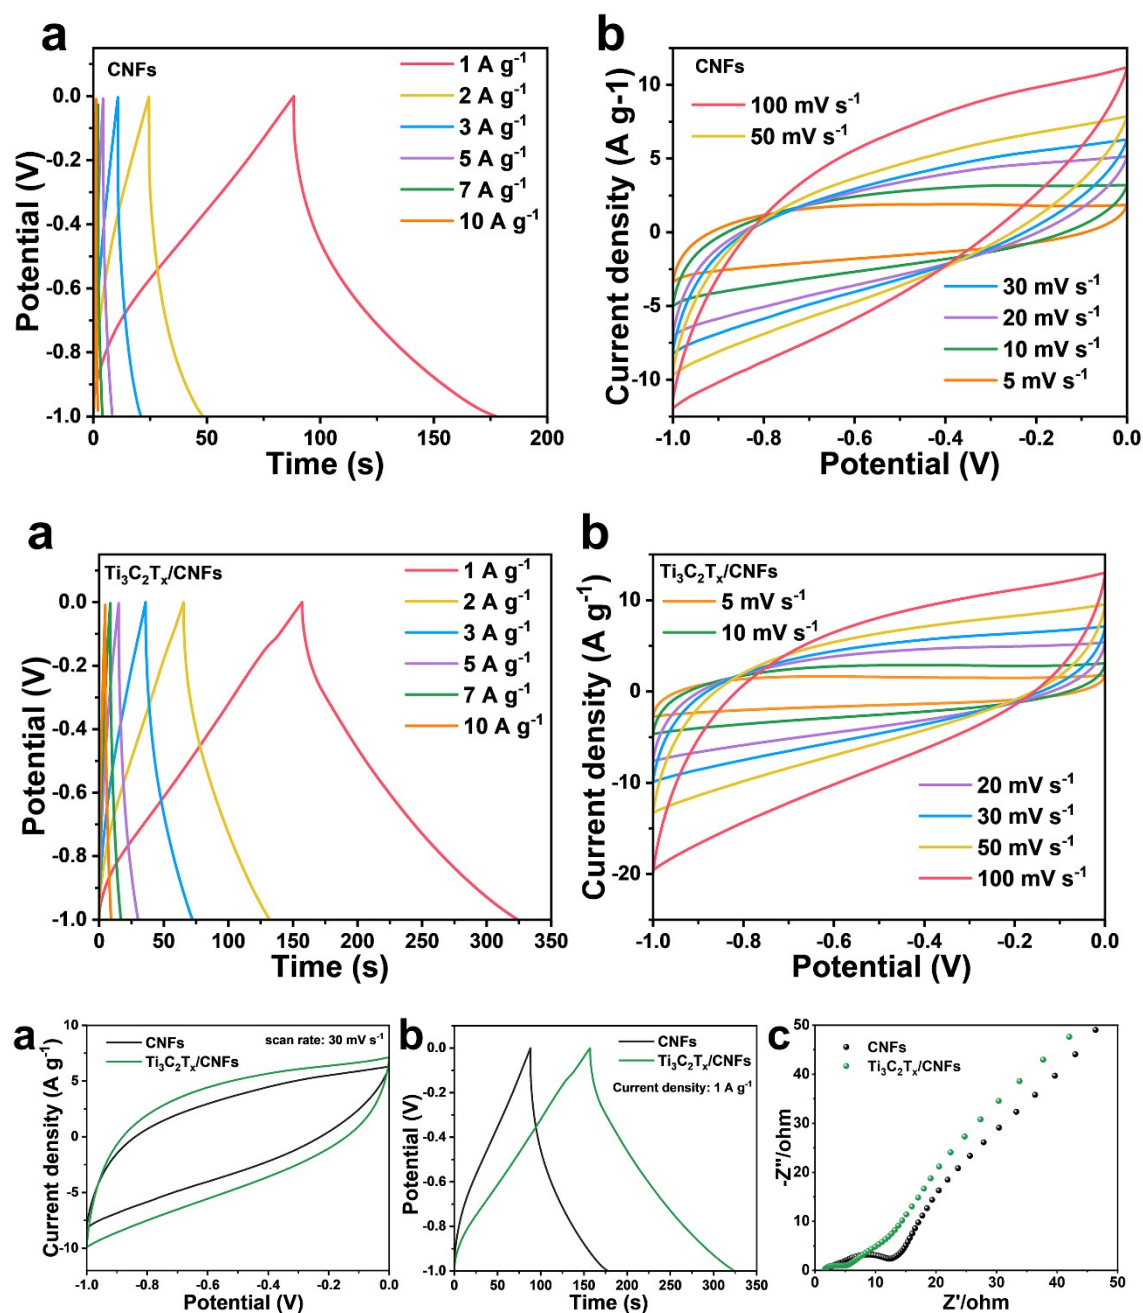

Figure S6. The electrochemical characterization of CNFs and Ti<sub>3</sub>C<sub>2</sub>T<sub>x</sub>/CNFs self-supported electrode. The capability of CNFs are 88.2, 47.6, 30.3, 20, 13.3, and 8 F g<sup>-1</sup> at current densities of 1, 2, 3, 5, 7, and 10, respectively. The capability of Ti<sub>3</sub>C<sub>2</sub>T<sub>x</sub>/CNFs are 166.9, 133.2, 109.2, 75, 57.4, and 44 F g<sup>-1</sup> at current densities of 1, 2, 3, 5, 7, and 10, respectively. The impedance diagram also shows that the semicircle part of Ti<sub>3</sub>C<sub>2</sub>T<sub>x</sub>/CNFs is significantly smaller than that of CNFs. Whether at the same scanning

rate or current density or impedance diagram, the  $\text{Ti}_3\text{C}_2\text{T}_x/\text{CNFs}$  is better than CNFs.

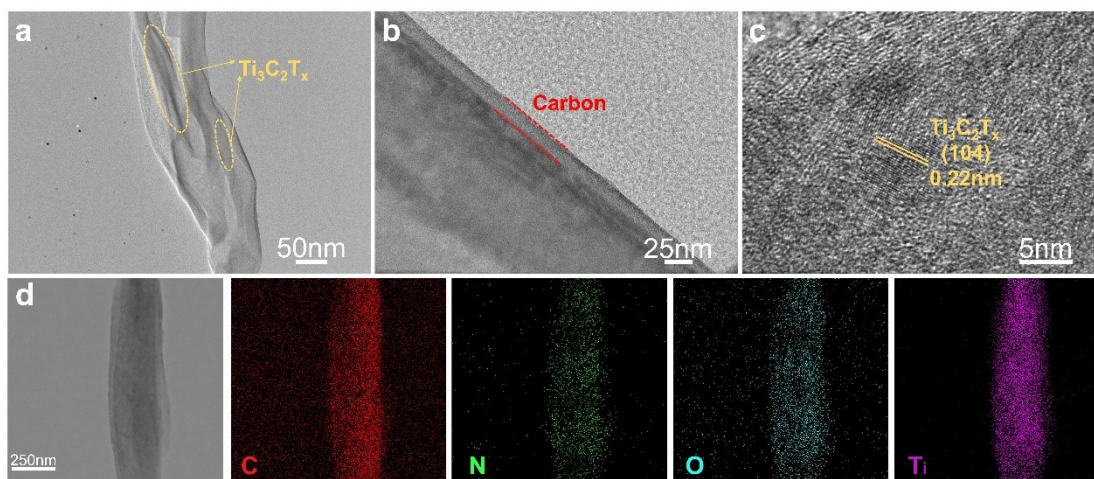

Figure S7. (a-c) TEM images of  $\text{Ti}_3\text{C}_2\text{T}_x/\text{CNFs}$  fibers and (d) Elemental maps of  $\text{Ti}_3\text{C}_2\text{T}_x/\text{CNFs}$ .

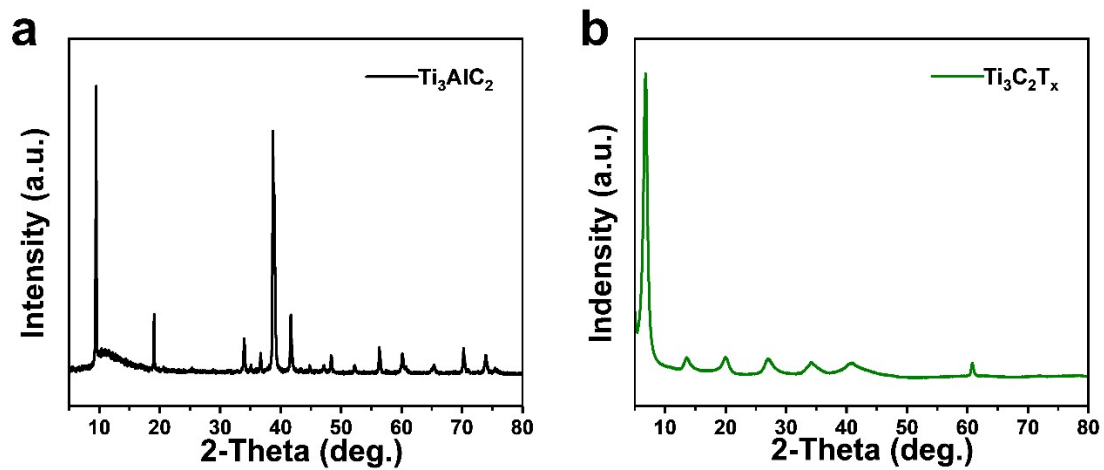

Figure S8. XRD patterns of (a)  $\text{Ti}_3\text{AlC}_2$  and (b)  $\text{Ti}_3\text{C}_2\text{T}_x$ .

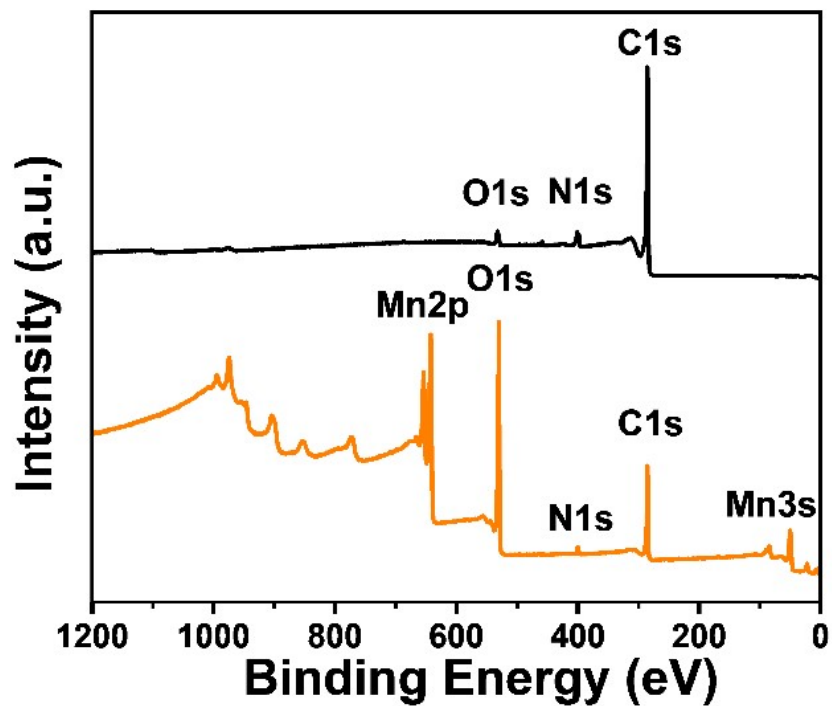

Figure S9. XPS survey spectra of  $\text{Ti}_3\text{C}_2\text{T}_x/\text{CNFs}$  and  $\text{MnO}_2@/\text{Ti}_3\text{C}_2\text{T}_x/\text{CNFs}$ .



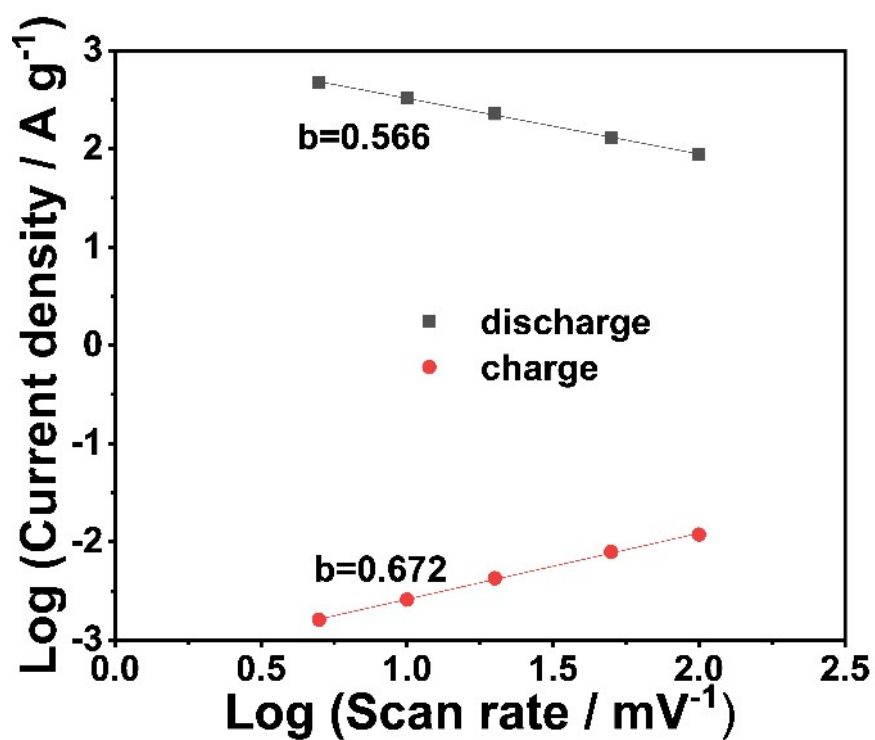

Figure S10 a. Fitted linear curves of  $\log i$  versus  $\log v$  based on the CV results.

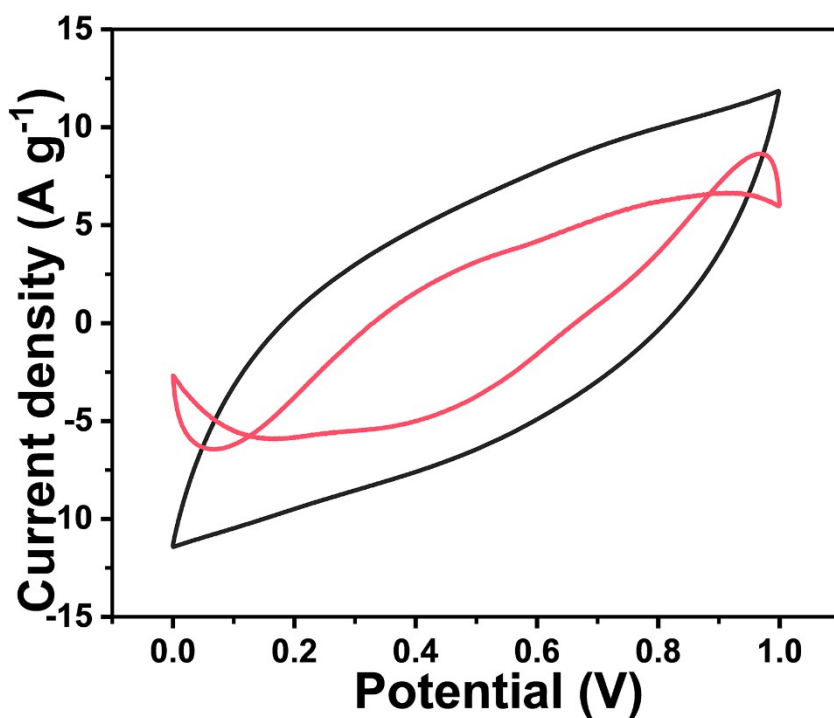

Figure S10 b. The surface-controlled processes account for capacitance contribution of  $\text{MnO}_2@\text{Ti}_3\text{C}_2\text{T}_x/\text{CNFs}$  is 67.7% of the total capacitance in  $100 \text{ mV s}^{-1}$ .

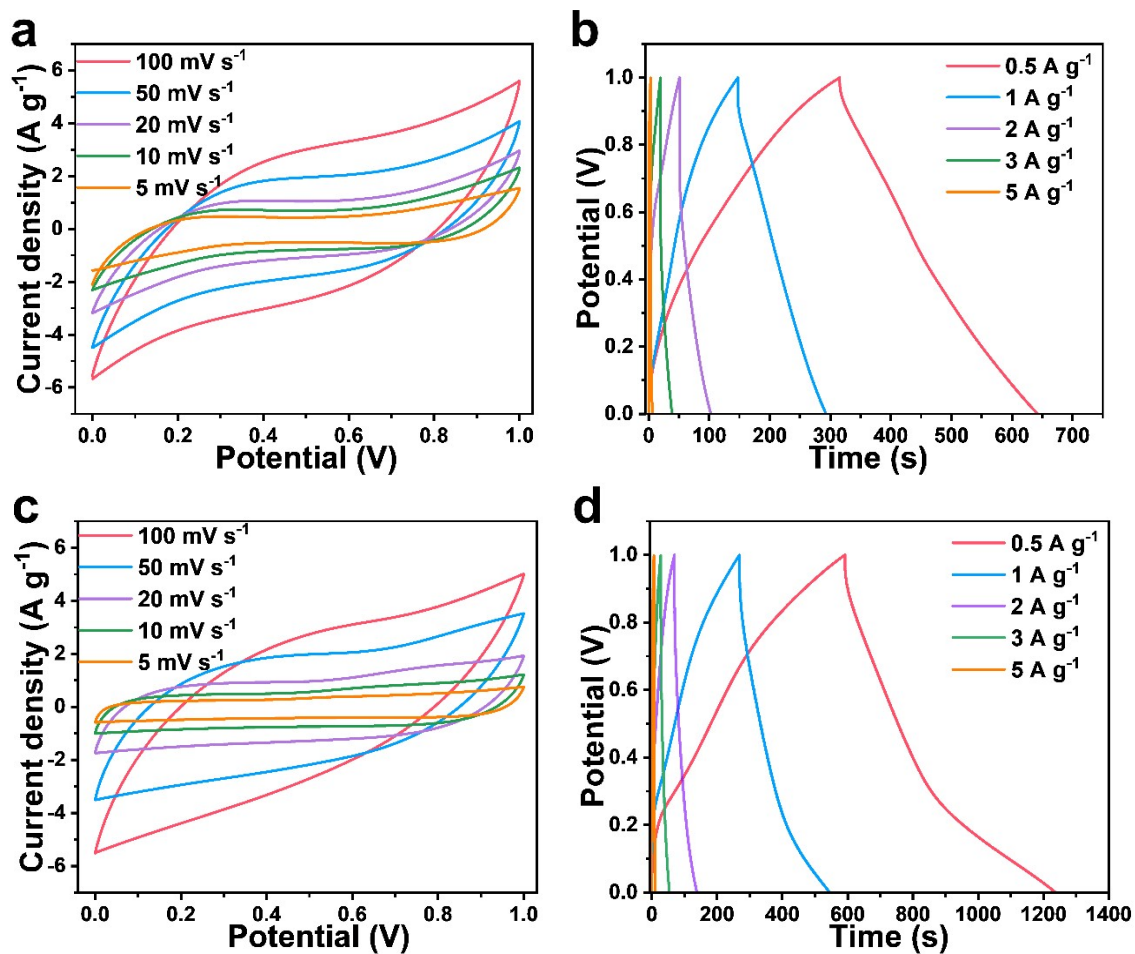

Figure S11. MnO<sub>2</sub>@Ti<sub>3</sub>C<sub>2</sub>T<sub>x</sub>: (a) CV curves and (b) GCD plots; MnO<sub>2</sub>@CNFs: (c) CV curves and (d) GCD plots.

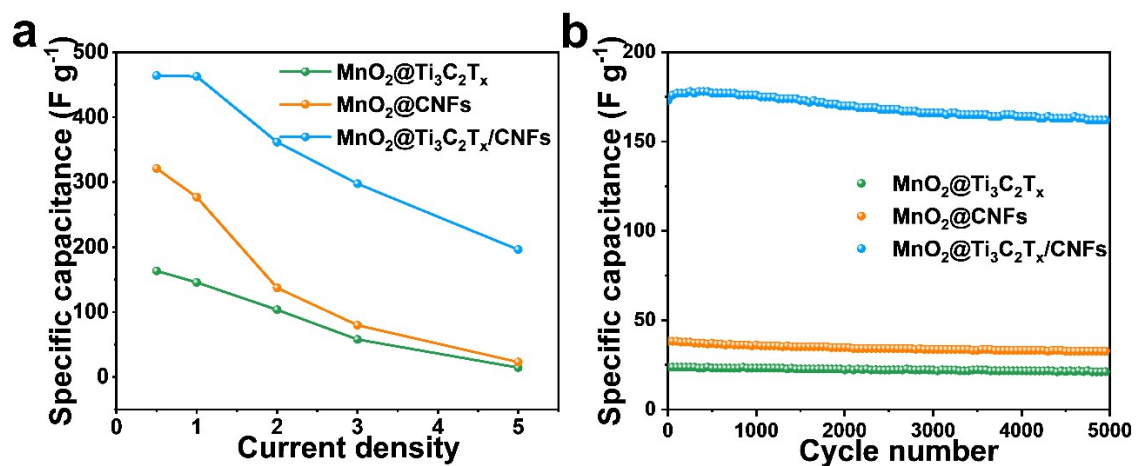

Figure S12. (a) Capacitances of MnO<sub>2</sub>@Ti<sub>3</sub>C<sub>2</sub>T<sub>x</sub>, MnO<sub>2</sub>@CNFs, and MnO<sub>2</sub>@Ti<sub>3</sub>C<sub>2</sub>T<sub>x</sub>/CNFs for different current densities and (b) Cycling stability of MnO<sub>2</sub>@Ti<sub>3</sub>C<sub>2</sub>T<sub>x</sub>, MnO<sub>2</sub>@CNFs, and MnO<sub>2</sub>@Ti<sub>3</sub>C<sub>2</sub>T<sub>x</sub>/CNFs.

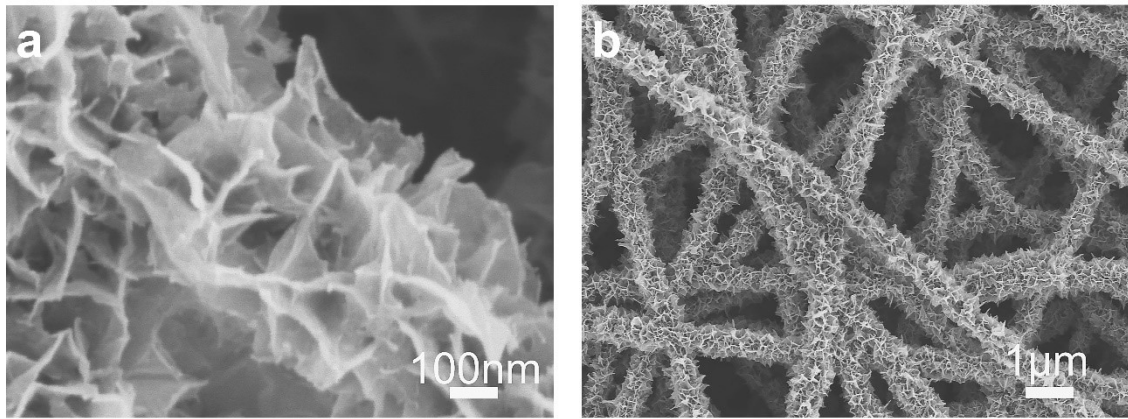

Figure S13 a. SEM images of  $\text{MnO}_2@\text{Ti}_3\text{C}_2\text{T}_x/\text{CNFs}$  electrode after 5,000 cycles.

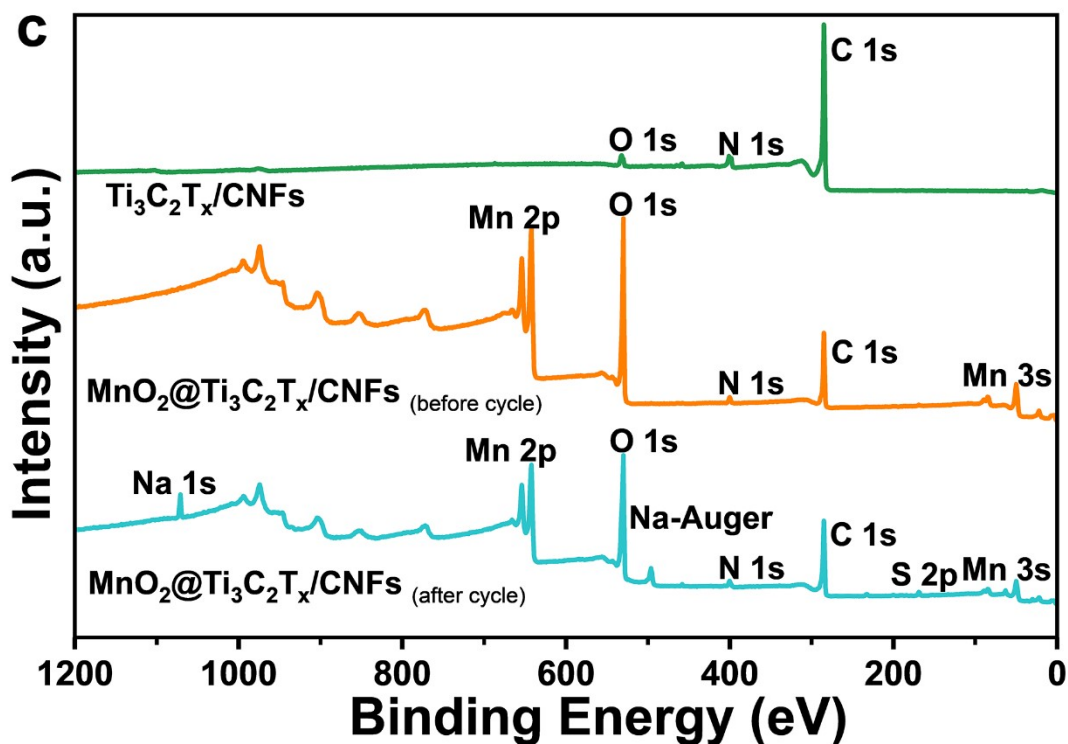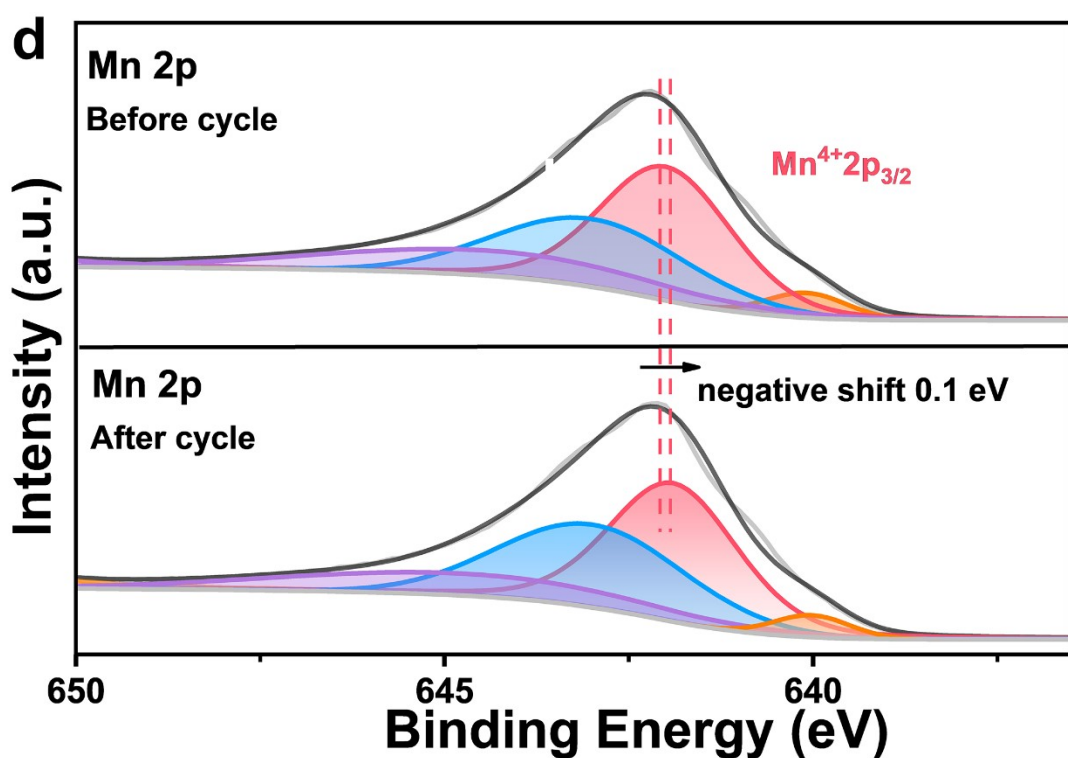

Figure S13 c&d. XPS comparison of  $\text{MnO}_2@\text{Ti}_3\text{C}_2\text{T}_x/\text{CNFs}$  electrode before and after 5,000 cycles. Due to the intercalation of  $\text{Na}^+$ , the elemental peak of Na can be seen in the XPS spectrum after the cycle, while there is no corresponding part of the spectrum

before the cycle (Figure S13c). Figure S13 d shows the refinement of Mn element. It can be seen that the main peak of  $Mn^{4+}$  shifts to the low binding energy which corresponds to the decrease of the valence state of Mn caused by  $Na^+$  intercalation.

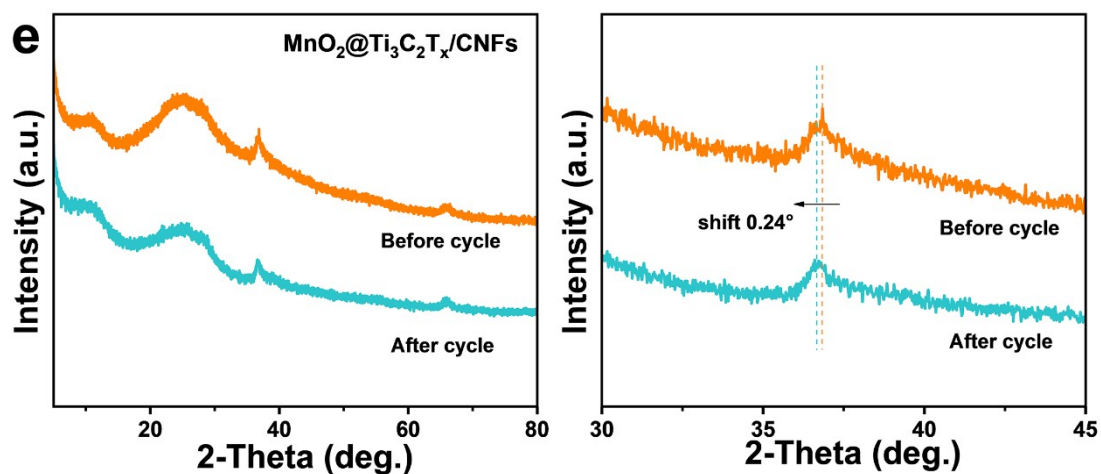

Figure S13 e. XRD comparison of  $MnO_2@Ti_3C_2T_x/CNFs$  electrode before and after 5,000 cycles. The XRD of the material before and after the cycle also showed a small peak shift. This corresponds to the increase of interlayer spacing of  $MnO_2$  caused by  $Na^+$  intercalation.

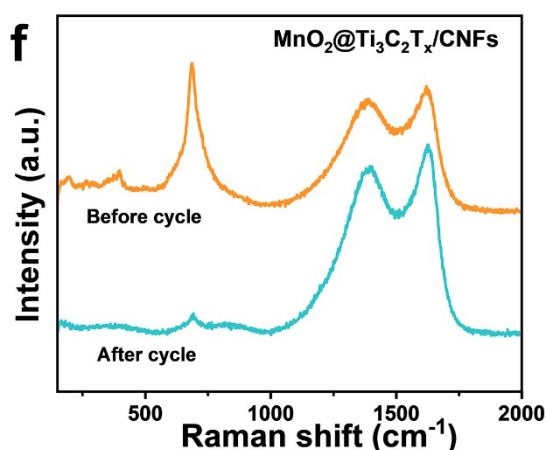

Figure S13 f. Raman comparison of  $MnO_2@Ti_3C_2T_x/CNFs$  electrode before and after 5,000 cycles. The Raman spectra of the material before and after cycling show the

decrease of Mn signal and the enhancement of D and G peaks, which may be caused by the increase of carbon fiber signal caused by partial dissolution of MnO<sub>2</sub>.

| Materials                                                                                                          | Energy density<br>(W h kg <sup>-1</sup> ) | Power density<br>(kW kg <sup>-1</sup> ) | Cycling stability | Reference |
|--------------------------------------------------------------------------------------------------------------------|-------------------------------------------|-----------------------------------------|-------------------|-----------|
| MnO <sub>2</sub> @Ti <sub>3</sub> C <sub>2</sub> T <sub>x</sub> /CNFs//AC                                          | 46.4                                      | 0.4                                     | 5000c/83%         | This work |
| 0.5-<br>CNT@MnO <sub>2</sub> /CFC//AC/CFC                                                                          | 27.8                                      | 0.25                                    | 10000c/84%        | 1         |
| MnO <sub>2</sub> /p- Ti <sub>3</sub> C <sub>2</sub> T <sub>x</sub> //Ti <sub>3</sub> C <sub>2</sub> T <sub>x</sub> | 14.3                                      | 0.79                                    | 2000c/80%         | 2         |
| CoB-V-MX//AC                                                                                                       | 31.5                                      | 0.8                                     | 2500c/89.2%       | 3         |
| Ti <sub>3</sub> C <sub>2</sub> T <sub>x</sub> /CuS//Ti <sub>3</sub> C <sub>2</sub> T <sub>x</sub>                  | 15.4                                      | 0.75                                    | 5000c/82.4%       | 4         |
| 1 T-VS <sub>2</sub> -MX // Ti <sub>3</sub> C <sub>2</sub> T <sub>x</sub>                                           | 41.13                                     | 0.793                                   | 5000c/85%         | 5         |
| MXene-PPy//MnO <sub>2</sub>                                                                                        | 26.7                                      | 0.32                                    | 5000c/86.9%       | 6         |
| NZ-R-2-200/K-Ar-MXene//<br>NPC/rGO                                                                                 | 57.48                                     | 0.4                                     | 2000c/60%         | 7         |

Table S1. The performance of this work is compared with that of ASC devices with similar work recently.



Equation S1:

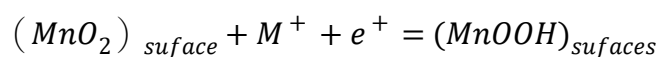

And

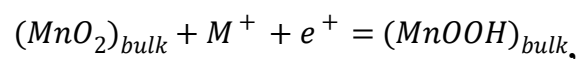

where  $M^+$  is related to  $H^+$  or alkali metal cations such as  $Li^+$ ,  $Na^+$ , or  $K^+$ . The first equation represents surface adsorption and desorption of protons or alkali metal ions, while the second equation indicates bulk insertion and extraction of these ions. In the two-step reversible redox reaction, the oxidation states of Mn ions change between III and IV.

Equation S2:

$$i = aV^b$$

If the value of the constant  $b$  is 1, the charge storage is predominantly influenced by surface processes. Conversely, when the value of  $b$  is 0.5, charge storage is primarily governed by diffusion processes.

Equation S3:

$$I(V) = k_1V + k_2V^{1/2}$$

The first term on the right side of the equation corresponds to the capacitance-controlled effect and the other involves diffusion-controlled insertion.  $i(V)$  and  $v$  are the current at potential  $V$  and scanning rate, slope, and intercept by plotting  $i(V)/v^{1/2}$  against  $v^{1/2}$

## Refence

1. K. Wu, Z. Ye, Y. Ding, Z. Zhu, X. Peng, D. Li and G. Ma, *Journal of Power Sources*, 2020, **477**.
2. X. Zhang, B. Shao, A. Guo, Z. Sun, J. Zhao, F. Cui and X. Yang, *Applied Surface Science*, 2021, **560**.
3. R. Venkatkarthick, J. Qin and T. Maiyalagan, *International Journal of Energy Research*, 2022, 46, 22474-22485.
4. Z. Pan, F. Cao, X. Hu and X. Ji, *Journal of Materials Chemistry A*, 2019, 7, 8984-8992.
5. Sharma A, Mane P and Chakraborty B, *Rout CS. ACS Appl Energy Mater.* 2021;4(12):14198-14209.
6. R. A. Chavan and A. V. Ghule, *Nanotechnology*, 2023, 34.
7. A. Ganiyat Olatoye, W. Li, E. Oluwaseyi Fagbohun, X. Zeng, Y. Zheng and Y. Cui, *Journal of Electroanalytical Chemistry*, 2023, 928.
